# Supplementary material
Source: PubMed Central journal article supplement (PMC1409720)
Supplement: 7601009s2.pdf [file 7601009s2.pdf]

## Supplementary Figures

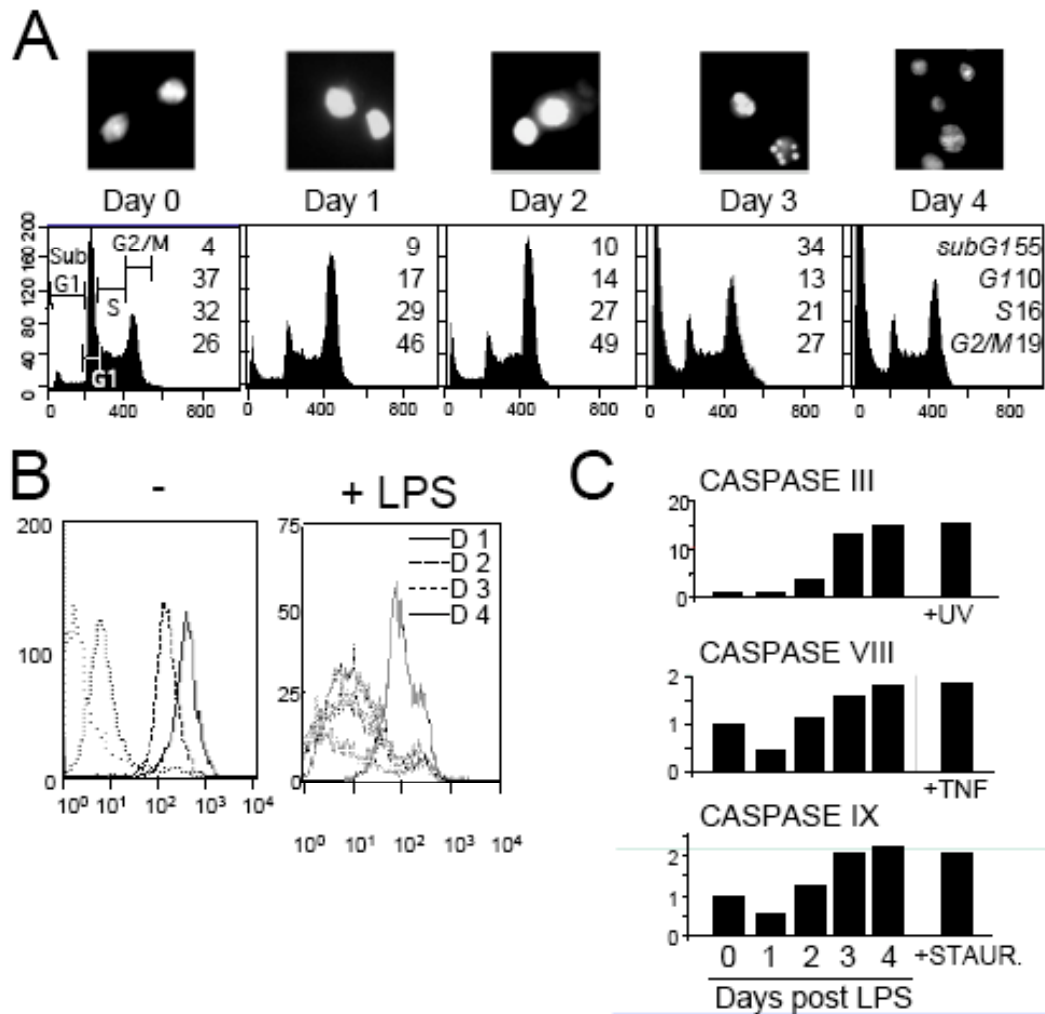

### Supplementary Figure 1

*Cell cycle changes and activation of caspases in LPS-stimulated I.29 $\mu$ + cells.*

A) Cell cycle analyses were performed by flow cytometry. The percentage of cells in each phase is reported for each day of LPS stimulation. Hoechst staining reveals the presence of frequent apoptotic cells after day 3 (upper panels).

B) Cell division analysis by CFSE staining on unstimulated and LPS-stimulated I.29 $\mu$ + cells.

C) Activation of caspases in LPS stimulated I.29 $\mu$ + cells. Specific caspase activities were determined by enzymatic assays in extracts from cells stimulated for the indicated times with LPS by monitoring the production of fluorogenic peptides (see Methods). UV light (45 seconds exposure followed by 4 hours incubation), TNF $\alpha$  (50 ng/ml for 5 minutes) and staurosporin (0,5  $\mu$ M for 1 hour) were used in control samples to stimulate optimal caspase activation. Caspase activity is expressed as fold change relative to day 0. One representative experiment is shown.

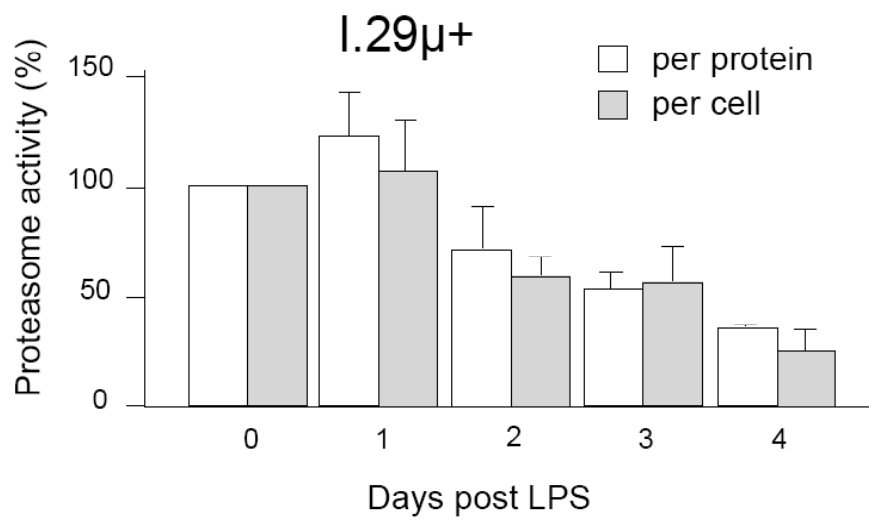

**Supplementary Figure 2**

*Proteasome activity per protein and per cell in LPS-stimulated I.29 $\mu$ +* cells.

Proteasomal chymotrypsin-like activity was assessed in extracts from LPS-stimulated I.29 $\mu$ +

I.29 $\mu$ +

cells as in Figure 2, and normalized either per total protein content in each sample or by the number of cells harvested at each timepoint. Data are expressed as percentage relative to day 0. Mean  $\pm$  SEM of two independent experiments.

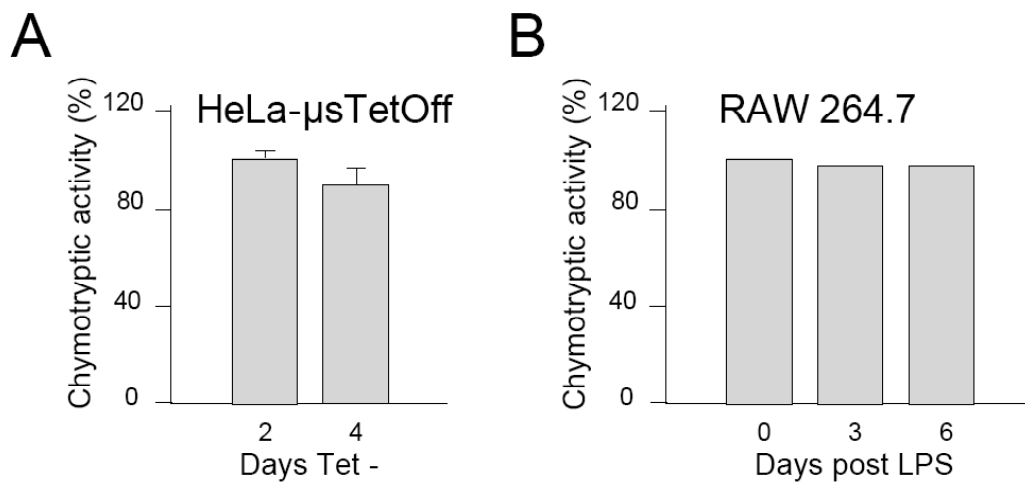

### Supplementary Figure 3

*A) Proteasomal activity does not decrease upon Ig- $\mu$  synthesis in HeLa- $\mu$ sTetOff cells.*

HeLa- $\mu$ sTetOff cells were cultured with or without tetracycline (Tet) for 2 or 4 days, and proteasomal chymotrypsin-like activity was assessed in extracts as in Figure 2. Activity in Tet- samples was expressed as percentage relative to Tet+ samples. Mean  $\pm$  SEM of two representative experiments.

*B) Proteasomal activity does not decrease upon LPS treatment in murine macrophages.*

The murine macrophagic cell-line RAW 264.7 was cultured in presence or absence of LPS (10 ng/ml) and assayed for proteasome activity after 3 and 6 days of treatment. Activity in LPS-treated samples was corrected by the values untreated samples at corresponding timepoints. Data from one representative experiment are shown
